# Supplementary material for: Cu(i)-catalysed asymmetric intramolecular tandem oxaziridination/rearrangement reaction: theoretical insight into the mechanism, enantioselectivity, ligand effect, and comparison with the corresponding Lewis-acid-promoted reaction
Source: Royal Society of Chemistry journal article supplement (doi:10.1039/d2qo01372j), 2022-12-02
Supplement: d2qo01372j2.pdf [file d2qo01372j2.pdf]

## *Supporting Information*

### **Cu(I)-catalysed Asymmetric Intramolecular Tandem**

### **Oxaziridination/Rearrangement Reaction: Theoretical Insight into Mechanism, Enantioselectivity, Ligand Effect, and Comparison with the Corresponding Lewis-acid-promoted Reaction**

Yongyin Liu, Guanghui Song, Hui Chen and Juan Li\*

College of Chemistry and Materials Science, Guangdong Provincial Key Laboratory of  
Functional Supramolecular Coordination Materials and Applications, Jinan University,  
Guangzhou, Guangdong 510632, P. R. China

\*Corresponding author. Email: tchjli@jnu.edu.cn (J. Li)

---

### **Table of Contents**

---

|                  |                                                                                             |     |
|------------------|---------------------------------------------------------------------------------------------|-----|
| <b>Section 1</b> | Other possible isomers for key species (Schemes S1-S4)                                      | S2  |
| <b>Section 2</b> | Other possible pathways to afford product <b>2-S</b> and conformer <b>2-R</b> (Figs. S1-S4) | S4  |
| <b>Section 3</b> | Ligand effect (Fig. S5)                                                                     | S8  |
| <b>Section 4</b> | Other possible acid-promoted pathways to afford <b>2-S</b> and <b>2-R</b> (Fig. S6)         | S9  |
| <b>Section 5</b> | Optimization with M06-D3 and $\omega$ B97XD methods (Table S1)                              | S10 |
| <b>Section 6</b> | Energies (in hartree) for all TSs and intermediates                                         | S10 |
| <b>Section 7</b> | Calculated imaginary frequencies of all transition states species                           | S14 |

---

## Section 1. Other possible isomers for key species

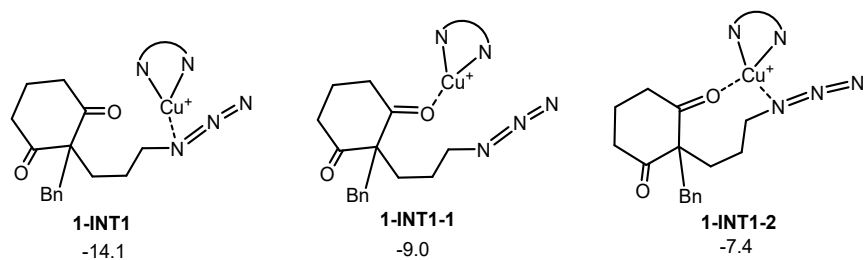

**Scheme S1** Other possible isomers of intermediate **1-INT1**. Values shown are relative free energies in kcal/mol.

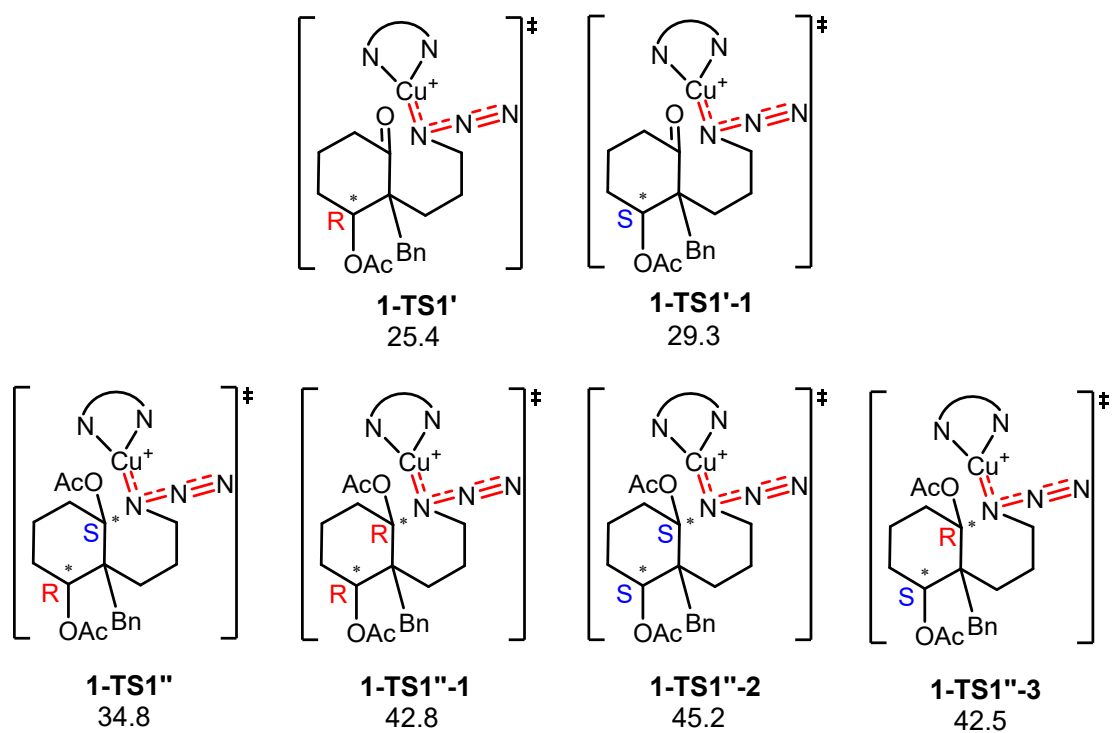

**Scheme S2** Other stereoisomeric modes of transition states **1-TS1'** and **1-TS1''**. Values shown are relative free energies in kcal/mol.

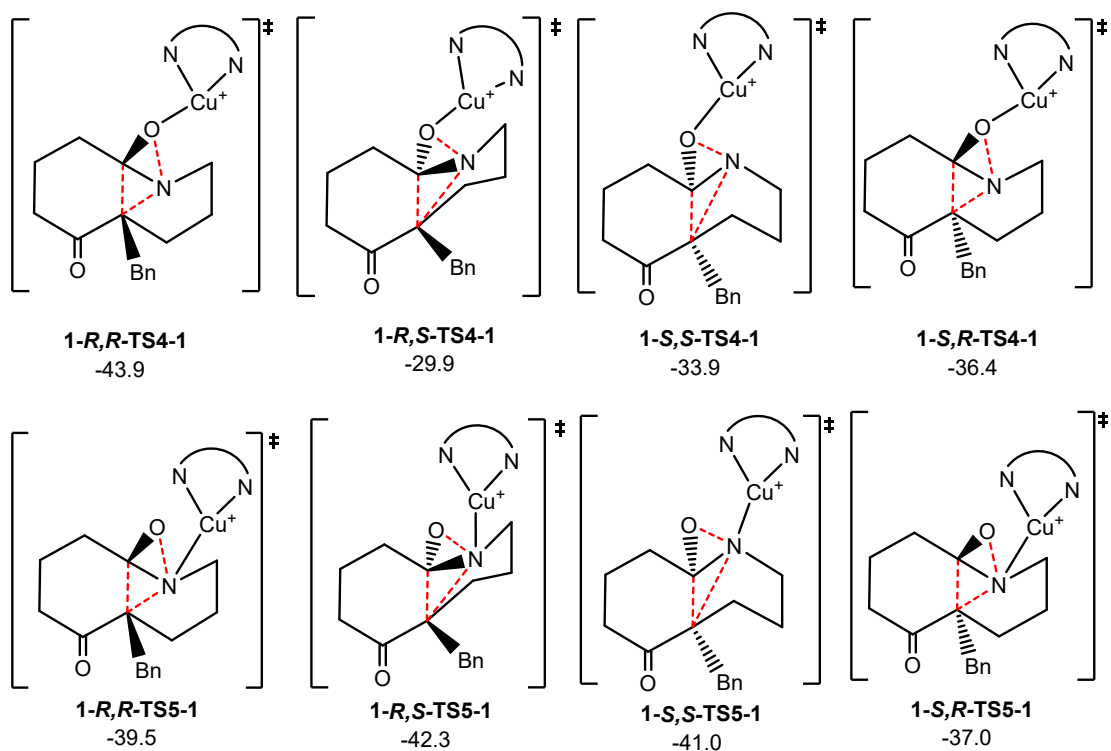

**Scheme S3** Other possible isomers of transition states **1-TS4** and **1-TS5**. Values shown are relative free energies in kcal/mol.

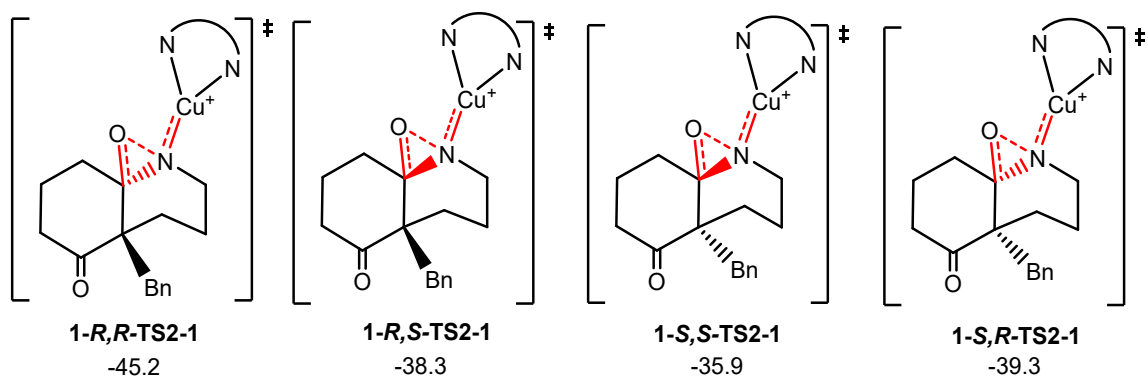

**Scheme S4** Other possible conformers of transition states **1-TS2**. Values shown are relative free energies in kcal/mol.

## Section 2. Other possible Cu-catalyzed pathways to afford 2-*S* and 2-*R*

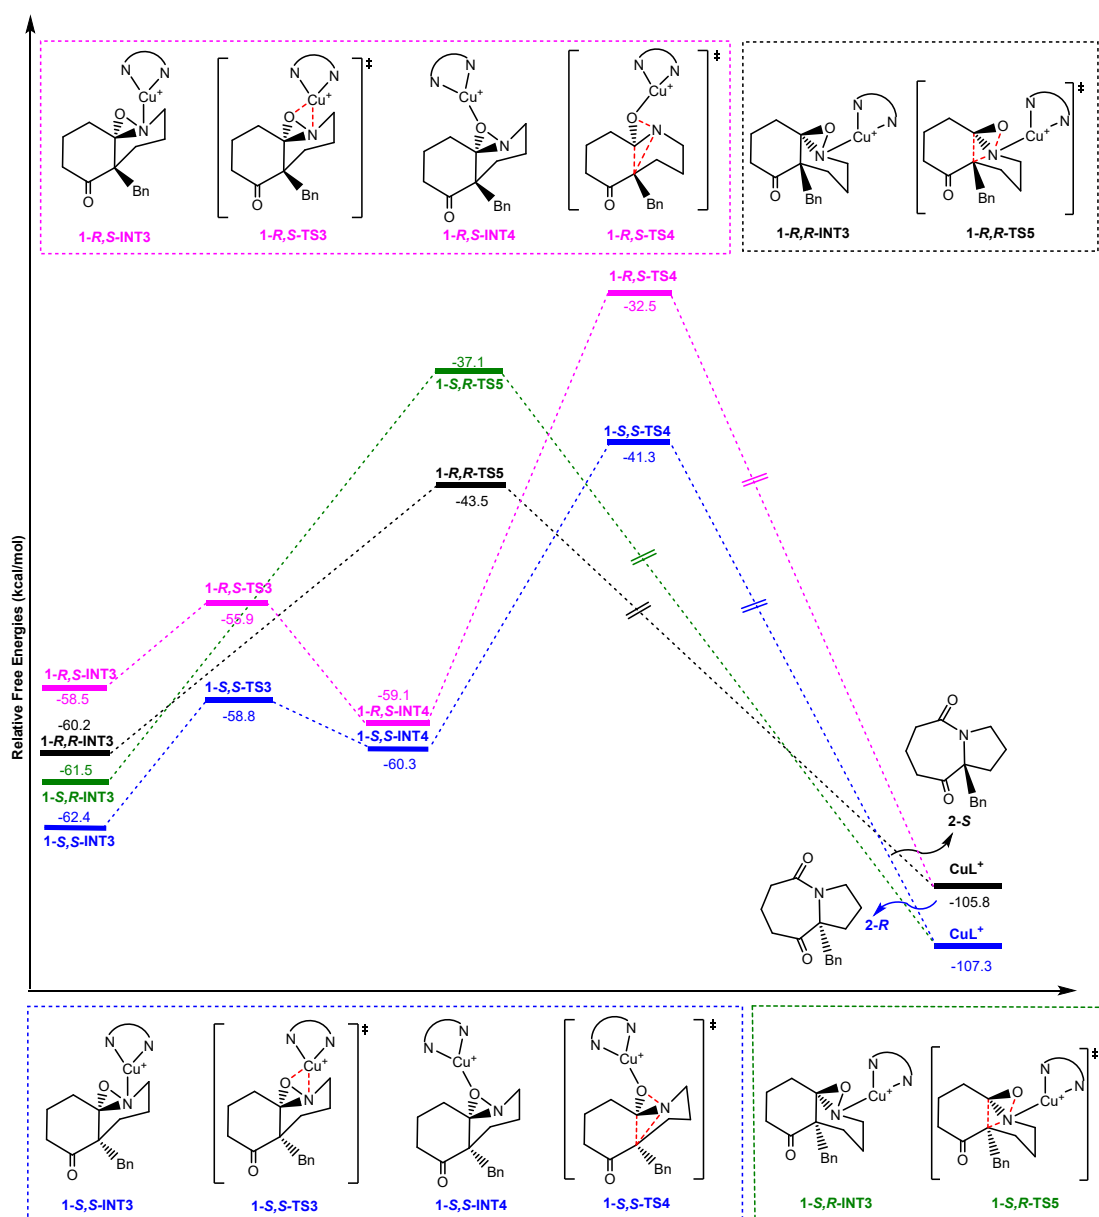

**Fig. S1** Calculated energy profiles for other possible rearrangement processes from 1-*R,R*-INT3, 1-*R,S*-INT3, 1-*S,S*-INT3 and 1-*S,R*-INT3, respectively. Values shown are relative free energies in kcal/mol.

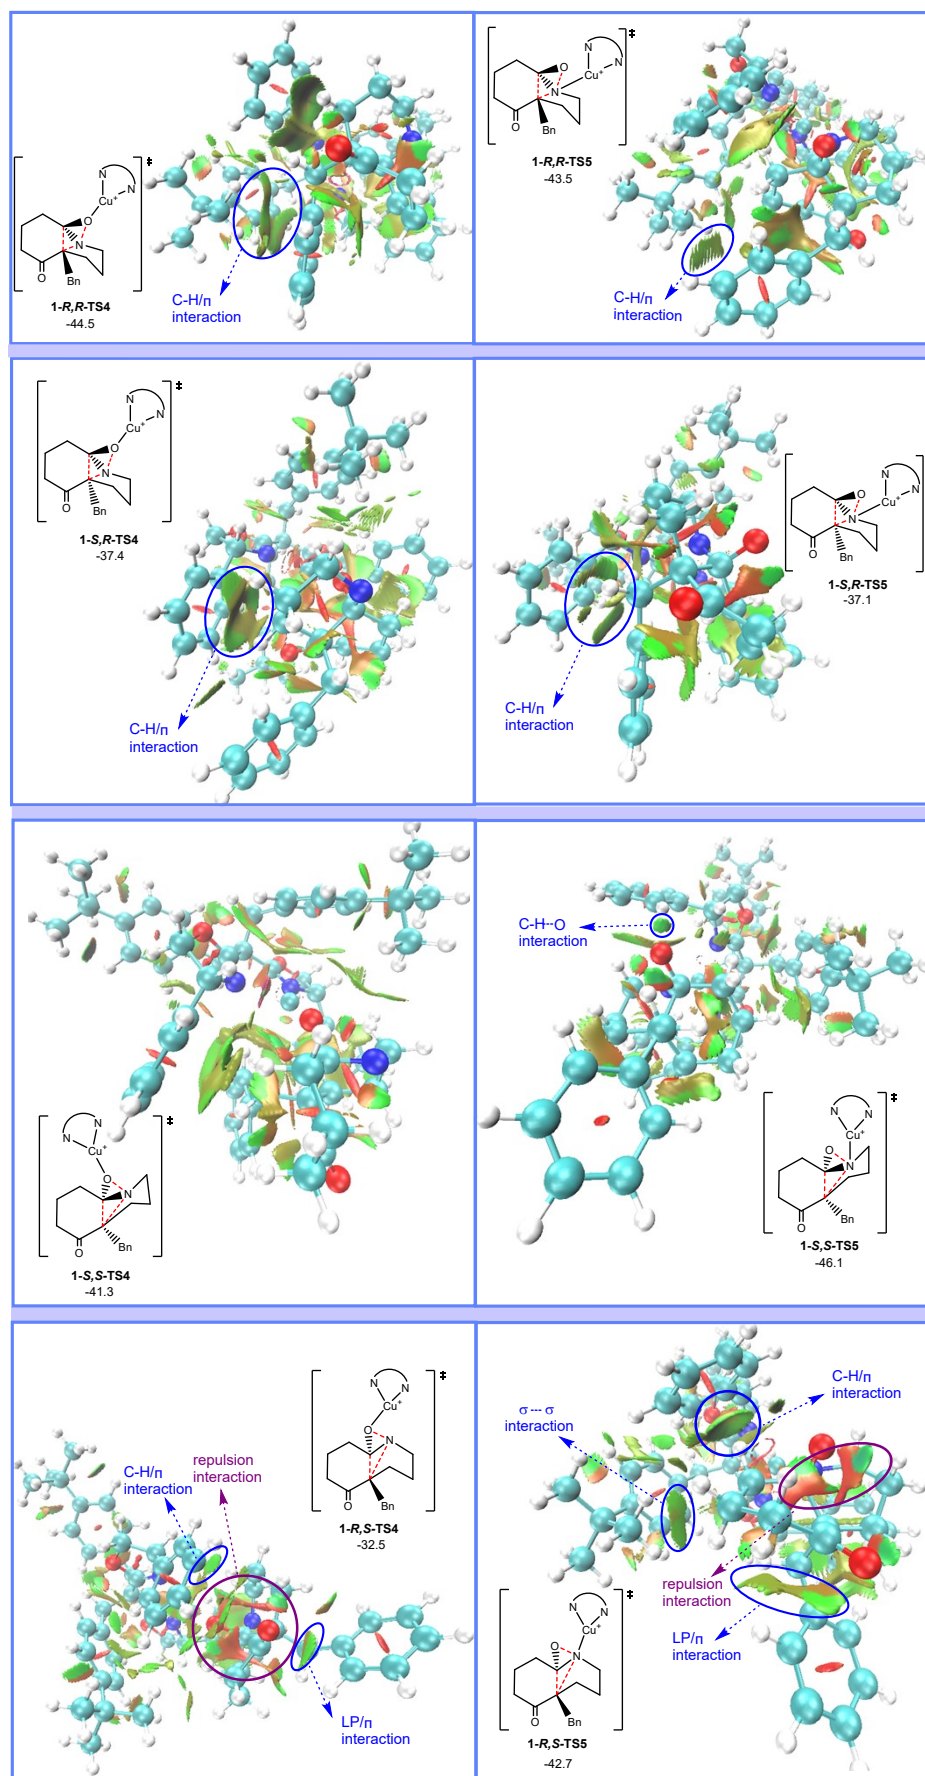

**Fig. S2** RDG analyses for the 1,2-alkyl-shift transition states (coordination of oxygen)

vs. nitrogen to copper). Distances and free energies are in units of Å and kcal/mol, respectively.

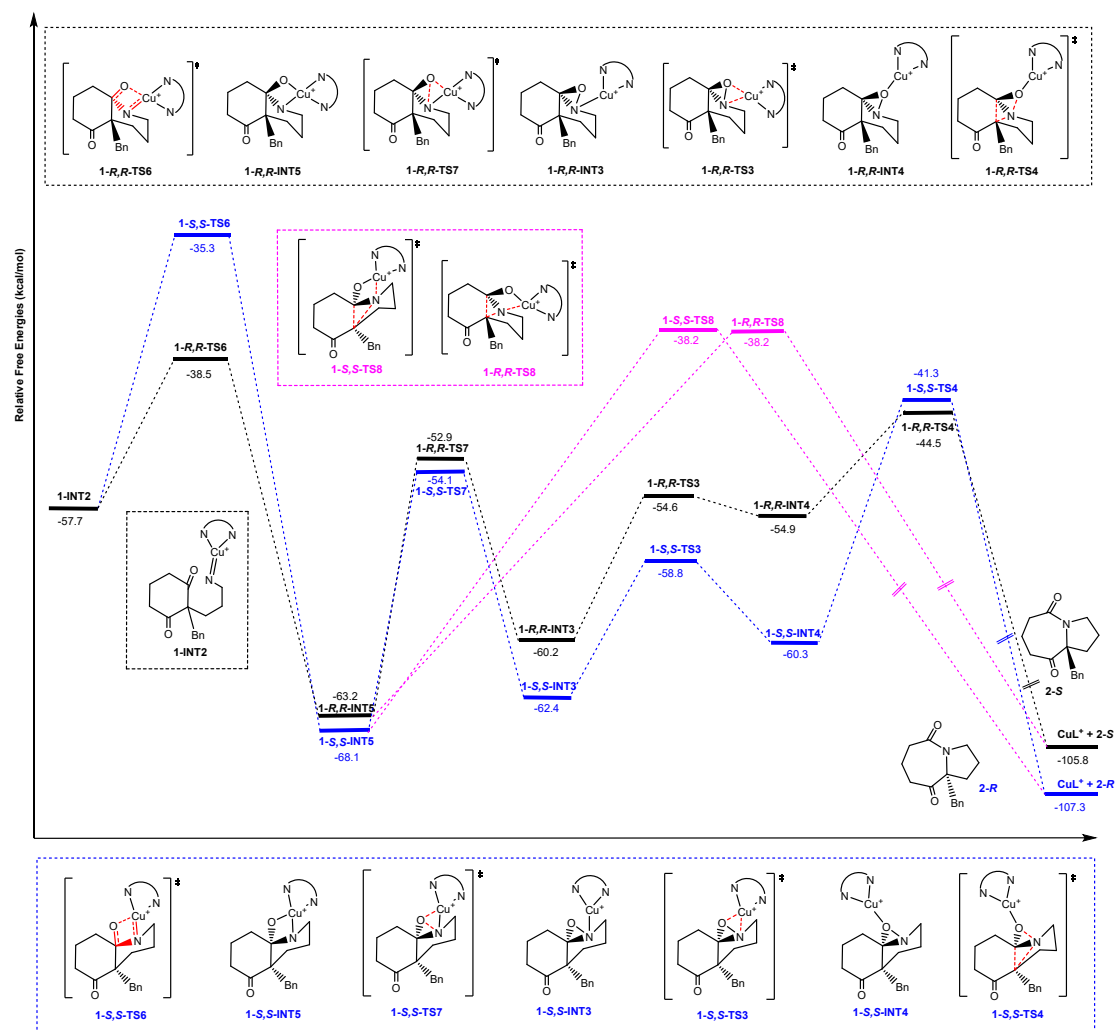

**Fig. S3** Calculated energy profiles for other possible pathways affording product **2-S** and byproduct **2-R** from **1-INT2**. Values shown are relative free energies in kcal/mol.

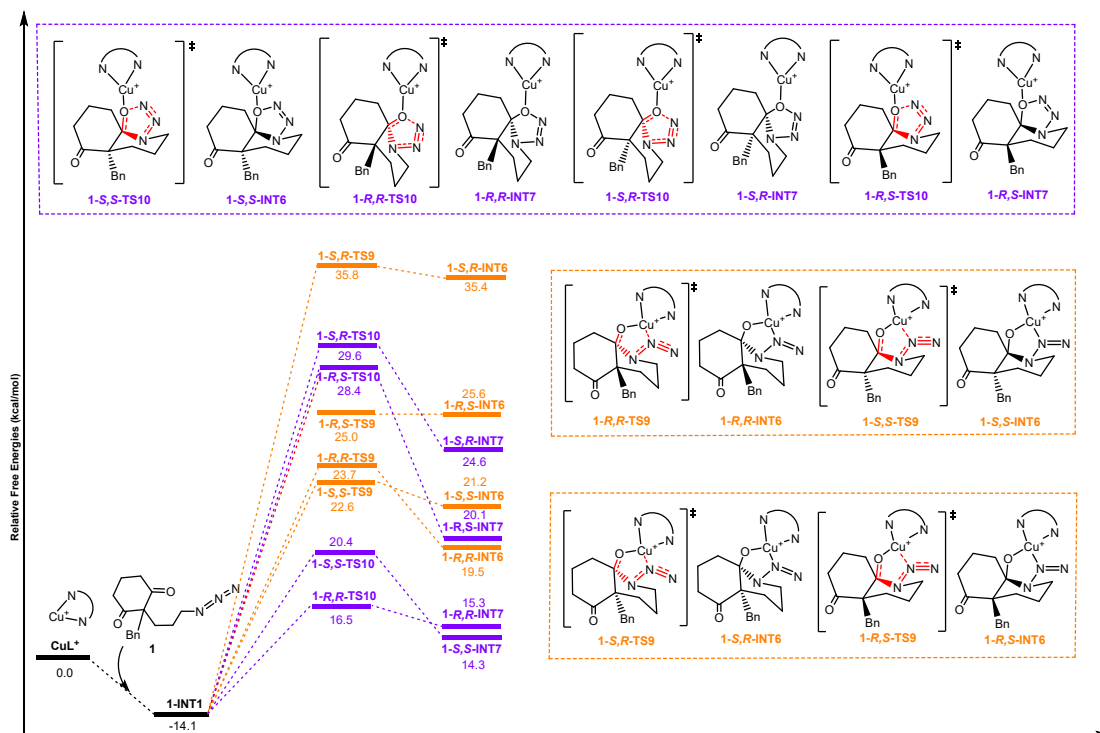

**Fig. S4** Calculated energy profiles for the process in which the C–N-bond forming is the first step. Values shown are relative free energies in kcal/mol.

### Section 3. Ligand effect

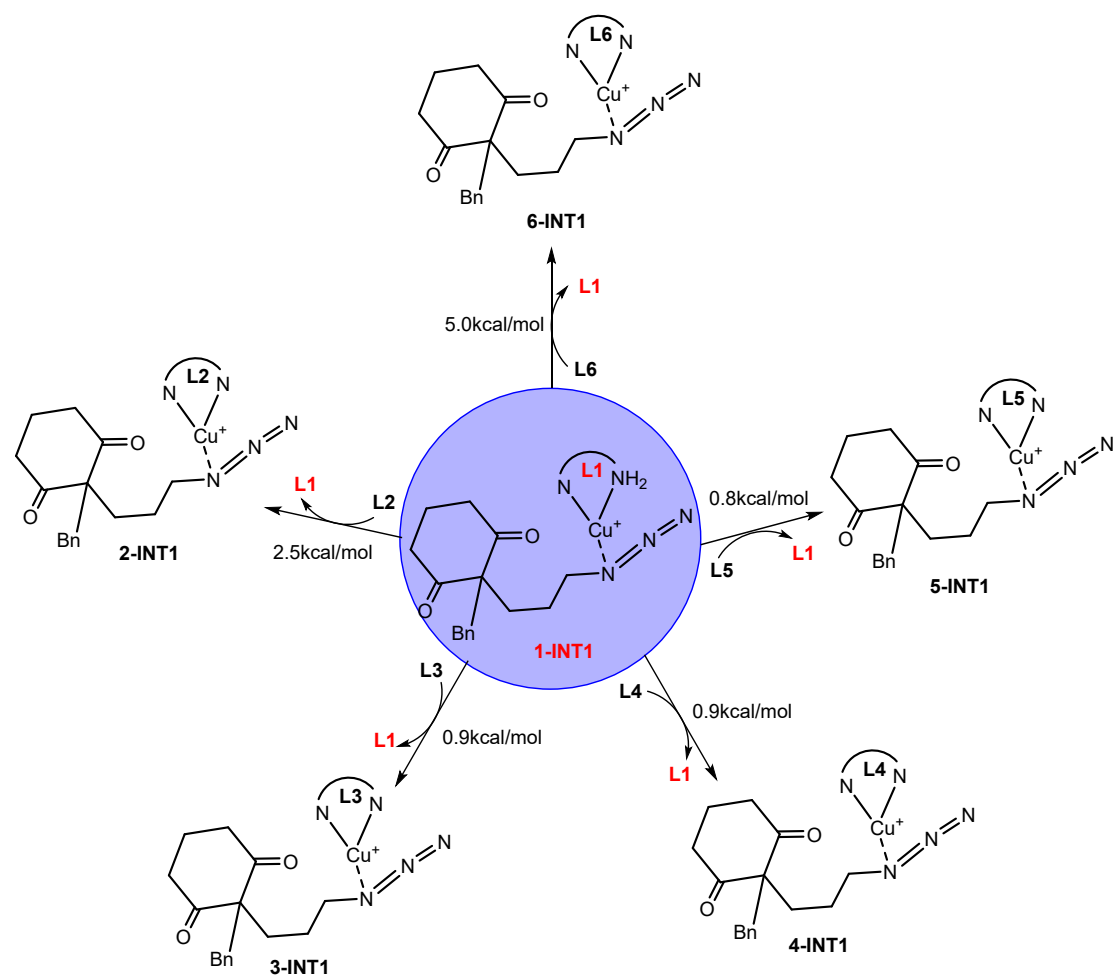

**Fig. S5** Ligand exchange energies of intermediate 1-INT1 for ligands L2–L6. Values shown are relative free energies in kcal/mol.



## Section 4. Other possible acid-promoted pathways to afford 2-*S* and 2-*R*

*R*

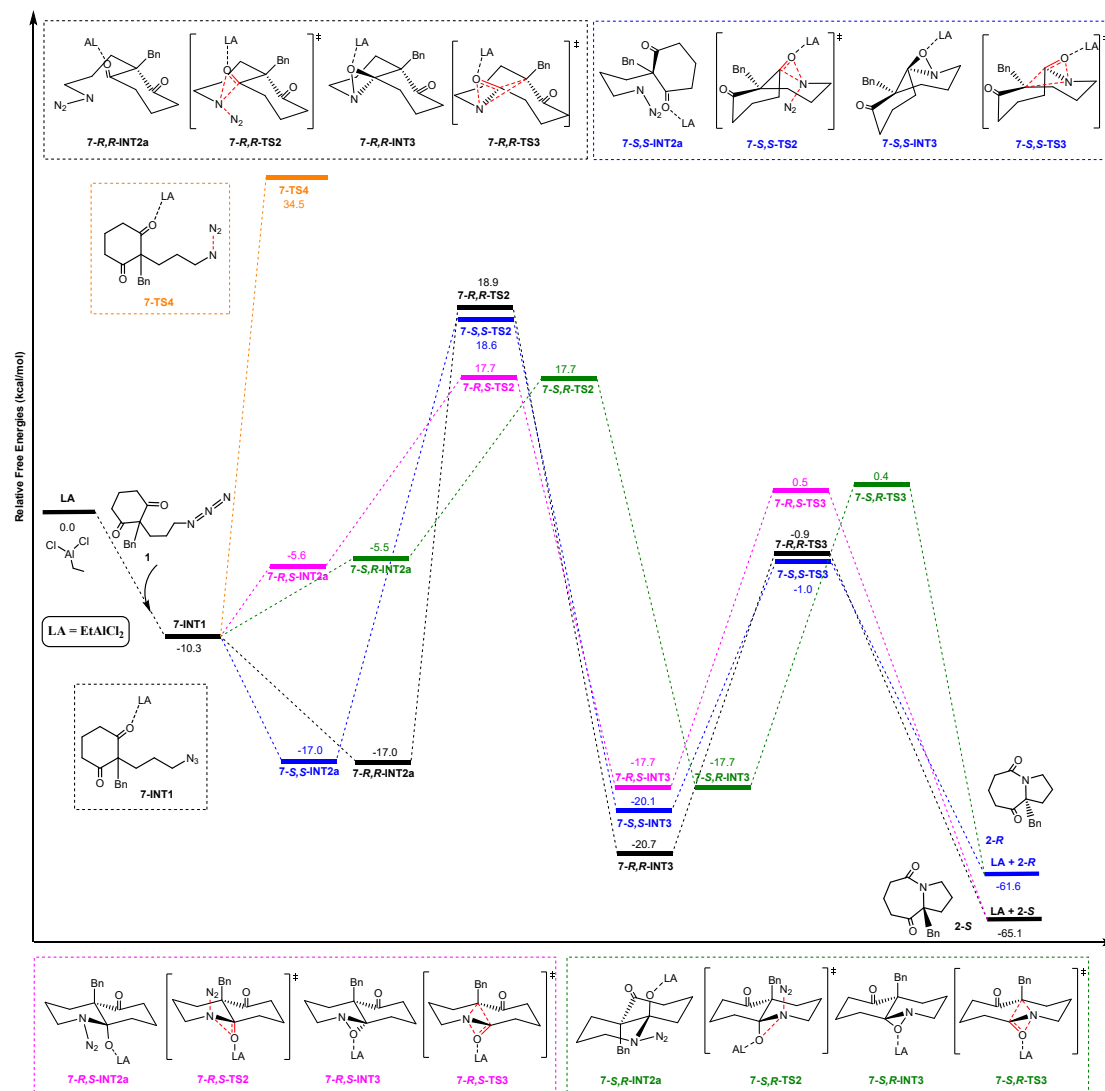

**Fig. S6** Calculated energy profiles for the other possible pathways of Lewis-acid-promoted asymmetric Schmidt reaction. Values shown are relative free energies in kcal/mol.

## Section 5. Optimization with M06-D3 and $\omega$ B97XD methods

**Table S1** Calculated free energy barriers (in kcal/mol) for the asymmetric oxaziridination step with M06-D3 and  $\omega$ B97XD methods

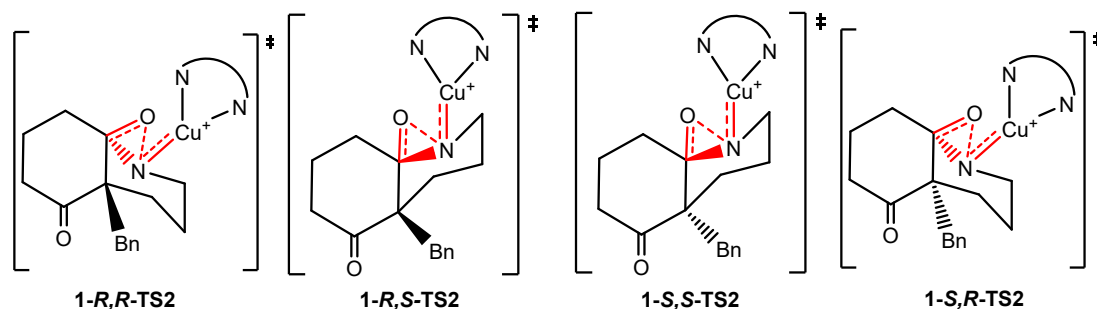

| Species                   | $\Delta\Delta G$ |
|---------------------------|------------------|
| 1-R,R-TS2-M06-D3          | 0.0              |
| 1-R,S-TS2-M06-D3          | 1.3              |
| 1-S,S-TS2-M06-D3          | 2.8              |
| 1-S,R-TS2-M06-D3          | 2.5              |
| <hr/>                     |                  |
| 1-R,R-TS2- $\omega$ B97XD | 0.0              |
| 1-R,S-TS2- $\omega$ B97XD | 4.6              |
| 1-S,S-TS2- $\omega$ B97XD | 4.7              |
| 1-S,R-TS2- $\omega$ B97XD | 4.3              |

## Section 6. Energies (in hartree) of All TSs and Intermediates

Solvent=dichloromethane:

| Geometry           | $E_0$        | $E$          | $H_{353.15}$ | $G_{353.15}$ | $E_{(sol,M06-D3)}$ |
|--------------------|--------------|--------------|--------------|--------------|--------------------|
| CuL <sup>+</sup>   | -2045.447061 | -2045.404318 | -2045.403374 | -2045.527444 | -2046.465952       |
| CuCl               | -656.421168  | -656.418414  | -656.417470  | -656.444676  | -657.6563139       |
| AgCl               | -606.027028  | -606.024190  | -606.023246  | -606.051502  | -607.2477728       |
| BArF <sup>-</sup>  | -3647.563630 | -3647.517060 | -3647.516116 | -3647.653715 | -3647.405246       |
| AgSbF <sub>6</sub> | -750.401864  | -750.391015  | -750.390071  | -750.441132  | -751.6485904       |
| NaBArF             | -3809.792515 | -3809.740924 | -3809.739979 | -3809.890536 | -3809.5992998      |
| NaSbF <sub>6</sub> | -766.993718  | -766.983427  | -766.982483  | -767.030032  | -767.0012536       |
| L                  | -1849.360791 | -1849.319611 | -1849.318667 | -1849.439317 | -1849.1767851      |
| N <sub>2</sub>     | -109.510010  | -109.507649  | -109.506705  | -109.528459  | -109.5546816       |
| 1                  | -935.502803  | -935.483307  | -935.482363  | -935.553228  | -935.422538        |

|             |              |              |              |              |               |
|-------------|--------------|--------------|--------------|--------------|---------------|
| 2-S         | -826.080658  | -826.064485  | -826.063541  | -826.124825  | -826.0230453  |
| 2-R         | -826.084870  | -826.068895  | -826.067950  | -826.128656  | -826.0266094  |
| 1-INT1      | -2980.988147 | -2980.924991 | -2980.924046 | -2981.090091 | -2981.9424057 |
| 1-INT1-1    | -2980.994599 | -2980.931413 | -2980.930468 | -2981.095402 | -2981.932478  |
| 1-INT1-2    | -2980.993802 | -2980.930345 | -2980.929401 | -2981.097598 | -2981.9320647 |
| 1-TS1       | -2980.963779 | -2980.900745 | -2980.899800 | -2981.064030 | -2981.903828  |
| 1-INT2      | -2871.470842 | -2871.409987 | -2871.409042 | -2871.569730 | -2872.436077  |
| 1-R,R-TS2   | -2871.461247 | -2871.401401 | -2871.400457 | -2871.558442 | -2872.402155  |
| 1-R,S-TS2   | -2871.451713 | -2871.392543 | -2871.391599 | -2871.546505 | -2872.415156  |
| 1-S,S-TS2   | -2871.453400 | -2871.393867 | -2871.392923 | -2871.550435 | -2872.4139793 |
| 1-S,R-TS2   | -2871.450701 | -2871.390844 | -2871.389900 | -2871.547480 | -2872.4122424 |
| 1-R,R-TS2-1 | -2871.459410 | -2871.399832 | -2871.398888 | -2871.555018 | -2872.4196612 |
| 1-R,S-TS2-1 | -2871.445759 | -2871.386573 | -2871.385629 | -2871.541747 | -2872.409747  |
| 1-S,S-TS2-1 | -2871.444988 | -2871.385617 | -2871.384673 | -2871.540999 | -2872.405549  |
| 1-S,R-TS2-1 | -2871.449315 | -2871.389401 | -2871.388457 | -2871.547039 | -2872.407723  |
| 1-R,R-INT3  | -2871.492559 | -2871.433197 | -2871.432253 | -2871.586643 | -2872.444441  |
| 1-R,S-INT3  | -2871.480197 | -2871.420279 | -2871.419335 | -2871.578774 | -2872.441294  |
| 1-S,S-INT3  | -2871.486149 | -2871.426494 | -2871.425550 | -2871.584167 | -2872.448416  |
| 1-S,R-INT3  | -2871.486676 | -2871.426787 | -2871.425842 | -2871.584096 | -2872.447253  |
| 1-R,R-TS3   | -2871.479591 | -2871.420226 | -2871.419282 | -2871.577068 | -2872.4352909 |
| 1-R,S-TS3   | -2871.478806 | -2871.419148 | -2871.418204 | -2871.578764 | -2872.4339103 |
| 1-S,S-TS3   | -2871.484683 | -2871.425255 | -2871.424311 | -2871.583228 | -2872.4401382 |
| 1-S,R-TS3   | -2871.479744 | -2871.420644 | -2871.419700 | -2871.575947 | -2872.4345895 |
| 1-R,R-INT4  | -2871.476159 | -2871.415982 | -2871.415038 | -2871.575519 | -2872.4339869 |
| 1-R,S-INT4  | -2871.486780 | -2871.426987 | -2871.426043 | -2871.585158 | -2872.4424948 |
| 1-S,S-INT4  | -2871.488335 | -2871.428708 | -2871.427764 | -2871.585586 | -2872.4453902 |
| 1-S,R-INT4  | -2871.473877 | -2871.414424 | -2871.413480 | -2871.573172 | -2872.4285157 |
| 1-R,R-TS4   | -2871.462875 | -2871.403768 | -2871.402824 | -2871.555947 | -2872.4221385 |
| 1-R,S-TS4   | -2871.442649 | -2871.382976 | -2871.382032 | -2871.540231 | -2872.3963796 |
| 1-S,S-TS4   | -2871.459012 | -2871.399409 | -2871.398465 | -2871.556438 | -2872.4113639 |
| 1-S,R-TS4   | -2871.460498 | -2871.401658 | -2871.400713 | -2871.552944 | -2872.4116197 |
| 1-R,R-TS4-1 | -2871.465136 | -2871.405906 | -2871.404962 | -2871.557323 | -2872.421007  |
| 1-R,S-TS4-1 | -2871.441448 | -2871.381775 | -2871.380831 | -2871.538953 | -2872.3931238 |
| 1-S,S-TS4-1 | -2871.448066 | -2871.388179 | -2871.387235 | -2871.544299 | -2872.4005347 |
| 1-S,R-TS4-1 | -2871.456608 | -2871.397446 | -2871.396502 | -2871.549864 | -2872.4077921 |
| 1-R,R-TS5   | -2871.458145 | -2871.399034 | -2871.398090 | -2871.552354 | -2872.4200164 |
| 1-R,S-TS5   | -2871.456443 | -2871.397050 | -2871.396106 | -2871.552355 | -2872.4159746 |
| 1-S,S-TS5   | -2871.466075 | -2871.407156 | -2871.406212 | -2871.561269 | -2872.4240111 |
| 1-S,R-TS5   | -2871.450749 | -2871.391399 | -2871.390455 | -2871.546644 | -2872.4076727 |
| 1-R,R-TS5-1 | -2871.455463 | -2871.396444 | -2871.395500 | -2871.550110 | -2872.4132084 |
| 1-R,S-TS5-1 | -2871.457764 | -2871.398486 | -2871.397542 | -2871.552681 | -2872.4168418 |
| 1-S,S-TS5-1 | -2871.454799 | -2871.395470 | -2871.394526 | -2871.553391 | -2872.4106774 |
| 1-S,R-TS5-1 | -2871.453972 | -2871.394623 | -2871.393679 | -2871.551199 | -2872.4051702 |

|            |              |              |              |              |               |
|------------|--------------|--------------|--------------|--------------|---------------|
| 1-R,R-TS6  | -2871.447763 | -2871.387415 | -2871.386471 | -2871.546172 | -2872.4036328 |
| 1-S,S-TS6  | -2871.442890 | -2871.383309 | -2871.382364 | -2871.538887 | -2872.426305  |
| 1-R,R-INT5 | -2871.485256 | -2871.425983 | -2871.425039 | -2871.582684 | -2872.450385  |
| 1-S,S-INT5 | -2871.493392 | -2871.434322 | -2871.433378 | -2871.589233 | -2872.4595202 |
| 1-R,R-TS7  | -2871.476074 | -2871.416563 | -2871.415619 | -2871.574426 | -2872.4307725 |
| 1-S,S-TS7  | -2871.480206 | -2871.421102 | -2871.420157 | -2871.575703 | -2872.4358409 |
| 1-R,R-TS8  | -2871.447924 | -2871.388535 | -2871.387591 | -2871.543892 | -2872.4086629 |
| 1-S,S-TS8  | -2871.447186 | -2871.387314 | -2871.386370 | -2871.545603 | -2872.4049657 |
| 1-R,R-TS9  | -2980.944956 | -2980.883788 | -2980.882844 | -2981.043589 | -2981.885605  |
| 1-R,S-TS9  | -2980.944878 | -2980.883908 | -2980.882964 | -2981.042740 | -2981.8853701 |
| 1-S,S-TS9  | -2980.947943 | -2980.886641 | -2980.885696 | -2981.046008 | -2981.888053  |
| 1-S,R-TS9  | -2980.933668 | -2980.872738 | -2980.871794 | -2981.031204 | -2981.8681042 |
| 1-R,R-INT6 | -2980.953458 | -2980.892551 | -2980.891607 | -2981.051294 | -2981.8955424 |
| 1-R,S-INT6 | -2980.946770 | -2980.885908 | -2980.884964 | -2981.043790 | -2981.8933471 |
| 1-S,S-INT6 | -2980.951470 | -2980.890128 | -2980.889184 | -2981.049537 | -2981.8918093 |
| 1-S,R-INT6 | -2980.935512 | -2980.874855 | -2980.873910 | -2981.031475 | -2981.8728548 |
| 1-R,R-TS10 | -2980.958764 | -2980.897286 | -2980.896342 | -2981.058500 | -2981.896382  |
| 1-R,S-TS10 | -2980.945371 | -2980.884125 | -2980.883181 | -2981.044770 | -2981.8782312 |
| 1-S,S-TS10 | -2980.953271 | -2980.892056 | -2980.891112 | -2981.052745 | -2981.8910771 |
| 1-S,R-TS10 | -2980.943639 | -2980.882642 | -2980.881698 | -2981.042535 | -2981.8773601 |
| 1-R,R-INT7 | -2980.966555 | -2980.905594 | -2980.904650 | -2981.065155 | -2981.9025826 |
| 1-R,S-INT7 | -2980.961736 | -2980.900552 | -2980.899608 | -2981.061200 | -2981.8933471 |
| 1-S,S-INT7 | -2980.969491 | -2980.908219 | -2980.907274 | -2981.068090 | -2981.9036945 |
| 1-S,R-INT7 | -2980.953211 | -2980.892310 | -2980.891366 | -2981.052643 | -2981.8867345 |
| 1-INT1'    | -3134.799924 | -3134.733501 | -3134.732557 | -3134.906026 | -3135.7513085 |
| 1-INT1'-1  | -3134.795907 | -3134.729746 | -3134.728801 | -3134.901456 | -3135.7477209 |
| 1-INT1''   | -3288.589025 | -3288.519138 | -3288.518194 | -3288.696711 | -3289.5550652 |
| 1-INT1''-1 | -3288.591042 | -3288.521182 | -3288.520238 | -3288.698782 | -3289.5591499 |
| 1-INT1''-2 | -3288.598243 | -3288.528166 | -3288.527222 | -3288.707204 | -3289.5615975 |
| 1-INT1''-3 | -3288.595522 | -3288.525452 | -3288.524508 | -3288.704897 | -3289.5594856 |
| 1-TS'      | -3134.763227 | -3134.696685 | -3134.695741 | -3134.868412 | -3135.7134292 |
| 1-TS'-1    | -3134.757669 | -3134.691523 | -3134.690578 | -3134.860428 | -3135.7041888 |
| 1-TS''     | -3288.538151 | -3288.467719 | -3288.466774 | -3288.648091 | -3289.4910381 |
| 1-TS''-1   | -3288.532484 | -3288.462622 | -3288.461678 | -3288.639235 | -3289.4867166 |
| 1-TS''-2   | -3288.539278 | -3288.468744 | -3288.467800 | -3288.647800 | -3289.4910292 |
| 1-TS''-3   | -3288.533484 | -3288.463802 | -3288.462858 | -3288.640314 | -3289.4902648 |
| 2-INT1     | -2666.685594 | -2666.633378 | -2666.632434 | -2666.775755 | -2667.5900918 |
| 2-TS1      | -2666.646925 | -2666.594351 | -2666.593407 | -2666.738608 | -2666.3584525 |
| 3-INT1     | -2745.273127 | -2745.216962 | -2745.216018 | -2745.371079 | -2746.1833121 |
| 3-TS1      | -2745.233559 | -2745.177469 | -2745.176525 | -2745.329721 | -2744.9507815 |
| 4-INT1     | -2902.427076 | -2902.366378 | -2902.365433 | -2902.526827 | -2903.3549467 |
| 4-TS1      | -2902.387478 | -2902.326728 | -2902.325784 | -2902.487844 | -2902.1235736 |
| 5-INT1     | -3340.756597 | -3340.697118 | -3340.696174 | -3340.857879 | -3341.6634372 |

|                                    |              |              |              |              |               |
|------------------------------------|--------------|--------------|--------------|--------------|---------------|
| 5-TS1                              | -3340.717517 | -3340.657979 | -3340.657035 | -3340.818140 | -3340.431068  |
| 6-INT1                             | -2204.715853 | -2204.671829 | -2204.670885 | -2204.796204 | -2205.7183373 |
| 6-TS1                              | -2204.675958 | -2204.631972 | -2204.631027 | -2204.756253 | -2204.4857495 |
| 1- <i>R,R</i> -TS2-M06-D3          | -2869.423219 | -2869.364554 | -2869.363609 | -2869.513932 | -2872.426944  |
| 1- <i>R,S</i> -TS2-M06-D3          | -2869.415228 | -2869.356307 | -2869.355363 | -2869.507598 | -2872.4217857 |
| 1- <i>S,S</i> -TS2-M06-D3          | -2869.415399 | -2869.356610 | -2869.355666 | -2869.508319 | -2872.4200069 |
| 1- <i>S,R</i> -TS2-M06-D3          | -2869.414118 | -2869.354922 | -2869.353978 | -2869.506825 | -2872.4191018 |
| 1- <i>R,R</i> -TS2- $\omega$ B97XD | -2870.497208 | -2870.438117 | -2870.437173 | -2870.592385 | -2873.4817107 |
| 1- <i>R,S</i> -TS2- $\omega$ B97XD | -2870.486383 | -2870.427614 | -2870.426670 | -2870.580405 | -2873.4762372 |
| 1- <i>S,S</i> -TS2- $\omega$ B97XD | -2870.488752 | -2870.429876 | -2870.428931 | -2870.583763 | -2873.4747444 |
| 1- <i>S,R</i> -TS2- $\omega$ B97XD | -2870.486590 | -2870.427288 | -2870.426343 | -2870.583523 | -2873.4727143 |

**Solvent=diethylether:**

|                      |              |              |              |              |               |
|----------------------|--------------|--------------|--------------|--------------|---------------|
| 1                    | -935.500249  | -935.480743  | -935.479799  | -935.551342  | -935.419035   |
| LA                   | -1242.139984 | -1242.132326 | -1242.131382 | -1242.174183 | -1242.1464968 |
| 2- <i>S</i>          | -826.084076  | -826.068067  | -826.067123  | -826.128192  | -826.0252677  |
| 2- <i>S</i> -1       | -826.066468  | -826.050787  | -826.049843  | -826.109284  | -826.006771   |
| 2- <i>R</i>          | -826.077078  | -826.061032  | -826.060088  | -826.121294  | -826.0193626  |
| 2- <i>R</i> -1       | -826.057516  | -826.041651  | -826.040707  | -826.101088  | -825.9972895  |
| N <sub>2</sub>       | -109.510368  | -109.508007  | -109.507063  | -109.528817  | -109.4855152  |
| 7-INT1               | -2177.686239 | -2177.658127 | -2177.657183 | -2177.748592 | -2177.6083854 |
| 7- <i>R,R</i> -INT2a | -2177.696668 | -2177.668946 | -2177.668001 | -2177.757438 | -2177.620711  |
| 7- <i>R,S</i> -INT2a | -2177.680975 | -2177.653924 | -2177.652979 | -2177.739632 | -2177.6053694 |
| 7- <i>S,S</i> -INT2a | -2177.696672 | -2177.668949 | -2177.668005 | -2177.757437 | -2177.6207143 |
| 7- <i>S,R</i> -INT2a | -2177.680956 | -2177.653918 | -2177.652973 | -2177.739549 | -2177.6053816 |
| 7- <i>R,R</i> -INT2b | -2177.688083 | -2177.660376 | -2177.659432 | -2177.748490 | -2177.6100082 |
| 7- <i>R,S</i> -INT2b | -2177.682891 | -2177.655349 | -2177.654405 | -2177.742550 | -2177.6059601 |
| 7- <i>S,S</i> -INT2b | -2177.683511 | -2177.656362 | -2177.655418 | -2177.743564 | -2177.6053119 |
| 7- <i>S,R</i> -INT2b | -2177.682876 | -2177.655343 | -2177.654399 | -2177.742488 | -2177.6059491 |
| 7- <i>R,R</i> -TS1a  | -2177.657846 | -2177.630823 | -2177.629879 | -2177.717254 | -2177.5748026 |
| 7- <i>R,S</i> -TS1a  | -2177.654652 | -2177.627804 | -2177.626860 | -2177.712962 | -2177.5710451 |
| 7- <i>S,S</i> -TS1a  | -2177.658510 | -2177.631649 | -2177.630705 | -2177.717165 | -2177.5744931 |
| 7- <i>S,R</i> -TS1a  | -2177.654657 | -2177.627807 | -2177.626863 | -2177.712965 | -2177.5710476 |
| 7- <i>R,R</i> -TS1b  | -2177.649744 | -2177.623019 | -2177.622075 | -2177.707261 | -2177.5631388 |
| 7- <i>R,S</i> -TS1b  | -2177.642990 | -2177.615954 | -2177.615010 | -2177.701670 | -2177.5599414 |
| 7- <i>S,S</i> -TS1b  | -2177.650165 | -2177.623030 | -2177.622086 | -2177.709234 | -2177.5639089 |

|                     |              |              |              |              |               |
|---------------------|--------------|--------------|--------------|--------------|---------------|
| 7- <i>S,R</i> -TS1b | -2177.642984 | -2177.615950 | -2177.615006 | -2177.701627 | -2177.55994   |
| 7- <i>R,R</i> -TS2  | -2177.647594 | -2177.620690 | -2177.619745 | -2177.706657 | -2177.5633642 |
| 7- <i>R,S</i> -TS2  | -2177.649019 | -2177.622120 | -2177.621176 | -2177.708012 | -2177.5651394 |
| 7- <i>S,S</i> -TS2  | -2177.647966 | -2177.621021 | -2177.620076 | -2177.707311 | -2177.5634141 |
| 7- <i>S,R</i> -TS2  | -2177.649030 | -2177.622132 | -2177.621187 | -2177.707961 | -2177.5651452 |
| 7- <i>R,R</i> -INT3 | -2068.183436 | -2068.158629 | -2068.157685 | -2068.240500 | -2068.1228291 |
| 7- <i>R,S</i> -INT3 | -2068.179285 | -2068.154666 | -2068.153722 | -2068.235476 | -2068.1192798 |
| 7- <i>S,S</i> -INT3 | -2068.182980 | -2068.158241 | -2068.157297 | -2068.239879 | -2068.1218851 |
| 7- <i>S,R</i> -INT3 | -2068.179285 | -2068.154667 | -2068.153723 | -2068.235475 | -2068.1192799 |
| 7- <i>R,R</i> -TS3  | -2068.151582 | -2068.126782 | -2068.125838 | -2068.209907 | -2068.0860164 |
| 7- <i>R,S</i> -TS3  | -2068.150122 | -2068.125612 | -2068.124668 | -2068.205733 | -2068.0860731 |
| 7- <i>S,S</i> -TS3  | -2068.151578 | -2068.126779 | -2068.125835 | -2068.209932 | -2068.0860165 |
| 7- <i>S,R</i> -TS3  | -2068.150170 | -2068.125644 | -2068.124699 | -2068.205900 | -2068.0861041 |
| 7-TS4               | -2177.613098 | -2177.584121 | -2177.583177 | -2177.676218 | -2177.5308883 |

$E_0$  = Sum of electronic and zero-point energies calculated by B3LYP-D3 in solvent

$E$  = Sum of electronic and thermal energies calculated by B3LYP-D3 in solvent

$H_{298.15}$  = Sum of electronic and thermal enthalpies calculated by B3LYP-D3 in solvent

$G_{298.15}$  = Sum of electronic and thermal free energies calculated by B3LYP-D3 in solvent

$E_{(M06-D3)}$  = Single point energies calculated by M06-D3 in solvent

## Section 7. Calculated imaginary frequencies of all transition states species.

| Species              | Frequency |
|----------------------|-----------|
| 1-TS1                | -498.72   |
| 1- <i>R,R</i> -TS2   | -267.54   |
| 1- <i>R,S</i> -TS2   | -211.63   |
| 1- <i>S,S</i> -TS2   | -219.16   |
| 1- <i>S,R</i> -TS2   | -49.34    |
| 1- <i>R,R</i> -TS2-1 | -110.41   |
| 1- <i>R,S</i> -TS2-1 | -130.95   |
| 1- <i>S,S</i> -TS2-1 | -316.37   |
| 1- <i>S,R</i> -TS2-1 | -92.78    |
| 1- <i>R,R</i> -TS3   | -94.25    |

|             |         |
|-------------|---------|
| 1-R,S-TS3   | -84.47  |
| 1-S,S-TS3   | -42.48  |
| 1-S,R-TS3   | -78.21  |
| 1-R,R-TS4   | -540.98 |
| 1-R,S-TS4   | -471.57 |
| 1-S,S-TS4   | -553.75 |
| 1-S,R-TS4   | -586.98 |
| 1-R,R-TS4-1 | -521.34 |
| 1-R,S-TS4-1 | -664.47 |
| 1-S,S-TS4-1 | -654.26 |
| 1-S,R-TS4-1 | -466.09 |
| 1-R,R-TS5   | -643.15 |
| 1-R,S-TS5   | -439.96 |
| 1-S,S-TS5   | -599.77 |
| 1-S,R-TS5   | -652.62 |
| 1-R,R-TS5-1 | -647.01 |
| 1-R,S-TS5-1 | -671.88 |
| 1-S,S-TS5-1 | -498.69 |
| 1-S,R-TS5-1 | -446.62 |
| 1-R,R-TS6   | -57.17  |
| 1-S,S-TS6   | -316.09 |
| 1-R,R-TS7   | -251.63 |
| 1-S,S-TS7   | -177.10 |
| 1-R,R-TS8   | -353.86 |
| 1-S,S-TS8   | -455.83 |
| 1-R,R-TS9   | -235.46 |
| 1-R,S-TS9   | -200.14 |
| 1-S,S-TS9   | -170.23 |
| 1-S,R-TS9   | -100.54 |
| 1-R,R-TS10  | -316.68 |
| 1-R,S-TS10  | -216.26 |
| 1-S,S-TS10  | -300.64 |
| 1-S,R-TS10  | -232.81 |
| 1-TS'       | -494.09 |
| 1-TS'-1     | -499.68 |
| 1-TS''      | -464.56 |
| 1-TS''-1    | -448.39 |
| 1-TS''-2    | -466.89 |
| 1-TS''-3    | -478.29 |
| 2-TS1       | -503.06 |
| 3-TS1       | -505.81 |
| 4-TS1       | -504.96 |
| 5-TS1       | -505.86 |

|                                    |         |
|------------------------------------|---------|
| 6-TS1                              | -501.64 |
| 7- <i>R,R</i> -TS1a                | -567.60 |
| 7- <i>R,S</i> -TS1a                | -561.94 |
| 7- <i>S,S</i> -TS1a                | -551.26 |
| 7- <i>S,R</i> -TS1a                | -561.80 |
| 7- <i>R,R</i> -TS1b                | -547.07 |
| 7- <i>R,S</i> -TS1b                | -578.29 |
| 7- <i>S,S</i> -TS1b                | -535.48 |
| 7- <i>S,R</i> -TS1b                | -578.28 |
| 7- <i>R,R</i> -TS2                 | -572.87 |
| 7- <i>R,S</i> -TS2                 | -566.40 |
| 7- <i>S,S</i> -TS2                 | -576.92 |
| 7- <i>S,R</i> -TS2                 | -565.69 |
| 7- <i>R,R</i> -TS3                 | -670.80 |
| 7- <i>R,S</i> -TS3                 | -392.47 |
| 7- <i>S,S</i> -TS3                 | -670.66 |
| 7- <i>S,R</i> -TS3                 | -389.83 |
| 7-TS4                              | -245.89 |
| 1- <i>R,R</i> -TS2-M06-D3          | -322.74 |
| 1- <i>R,S</i> -TS2-M06-D3          | -304.57 |
| 1- <i>S,S</i> -TS2-M06-D3          | -284.63 |
| 1- <i>S,R</i> -TS2-M06-D3          | -355.00 |
| 1- <i>R,R</i> -TS2- $\omega$ B97XD | -302.13 |
| 1- <i>R,S</i> -TS2- $\omega$ B97XD | -268.83 |
| 1- <i>S,S</i> -TS2- $\omega$ B97XD | -290.35 |
| 1- <i>S,R</i> -TS2- $\omega$ B97XD | -191.37 |
